# Supplementary material for: Intraflagellar transport is deeply integrated in hedgehog signaling
Source: PubMed Central journal article supplement — Mol Biol Cell. 2018 May 15;29(10):1178–89. doi: 10.1091/mbc.E17-10-0600 (PMC5935068; doi:10.1091/mbc.e17-10-0600), 2018-05-15
Supplement: mbc-29-1178-s001.pdf [file mbc-29-1178-s001.pdf]

# Supplemental Materials

*Molecular Biology of the Cell*

Eguether et al.

**Figure S1. Characterization of CRISPR Knock Out cells**

**A.** Immunoblot showing that IFT27 is not expressed in CRISPR *SuFu*<sup>-/-</sup>, *Ift27*<sup>-/-</sup> lines (28, 11, 6, 1). *Ift27*<sup>-/-</sup> (Mut) and wild type (WT) MEFs are included as controls. GAPDH was used as a loading control.

**B.** Immunoblot showing that IFT74 is not expressed in CRISPR *Ift74*<sup>-/-</sup> lines (33, 30) but is present in the parental NIH 3T3 (WT) line. Gamma tubulin was used as a loading control. Error Bars are SD.

**A**

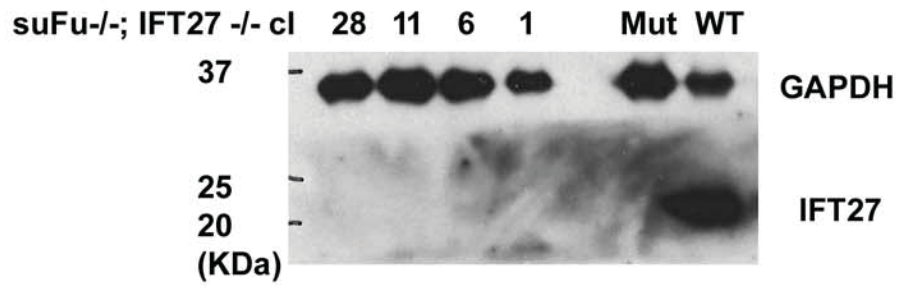

**B**

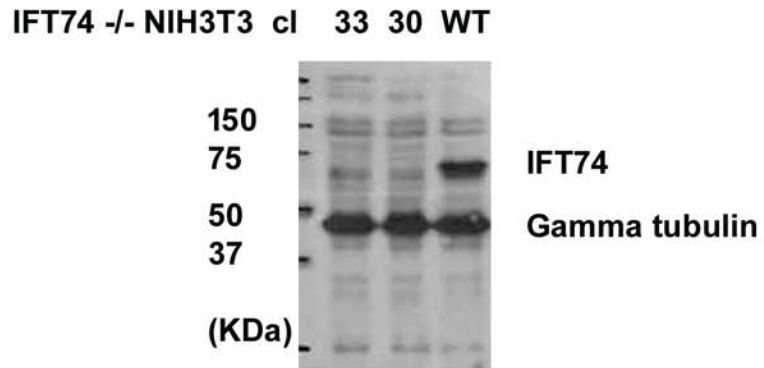

Supplemental Figure 1
